# Supplementary material
Source: Springer Nature journal article supplement (https://www.springermedizin.de/resource/supplementary/12890_2013_578_MOESM4_ESM.pdf/9505354)

**A**

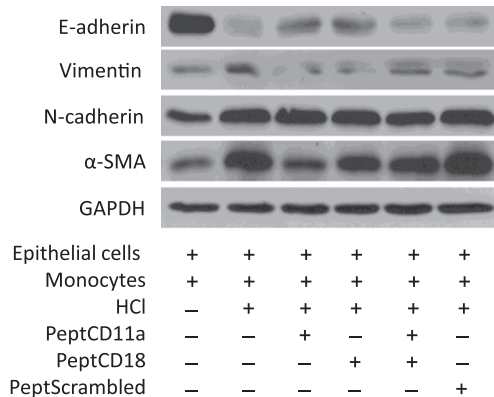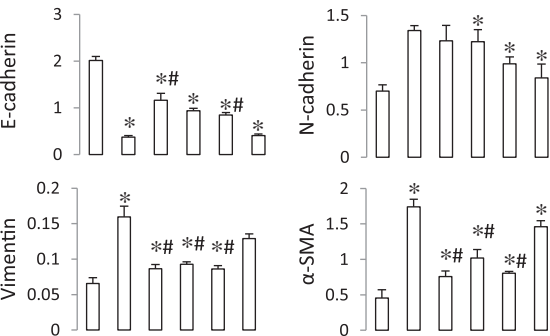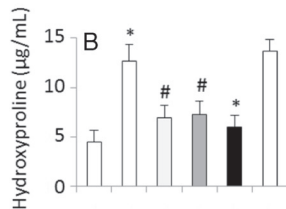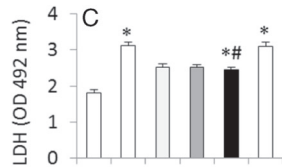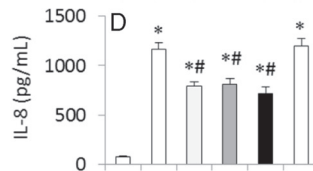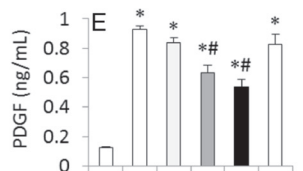

|                  |   |   |     |     |     |     |
|------------------|---|---|-----|-----|-----|-----|
| Epithelial cells | + | + | +   | +   | +   | +   |
| Monocytes        | + | + | +   | +   | +   | +   |
| HCl              | - | + | +   | +   | +   | +   |
| PeptCD11a        | - | - | 1.0 | -   | 1.0 | -   |
| PeptCD18         | - | - | -   | 1.0 | 1.0 | -   |
| PeptScrambled    | - | - | -   | -   | -   | 1.0 |

Supplement: MOESM4 [file 9505354]
